# Supplementary material
Source: MDPI journal article supplement (https://www.mdpi.com/2311-5637/6/1/20)
Supplement: s1 [file s1]

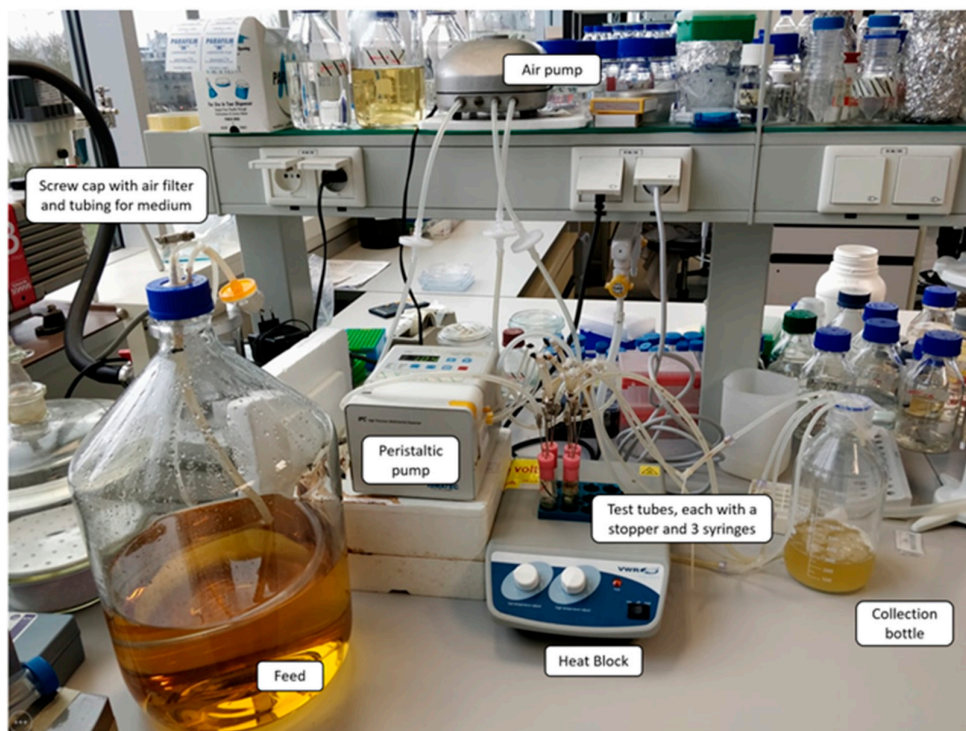

**Figure S1.** The experimental setup of the ministats. Four 15 mL test tubes are placed in a heat block at 30 °C and are equipped with a stopper and three needles: one for the feed, one for air supply and one for the output. Medium is fed to the test tubes from the 10 L bottle with fresh medium through a peristaltic pump. Air is pumped into the test tube through an air filter, which causes overpressure and the outflow of medium through the output needle into the collection bottle.

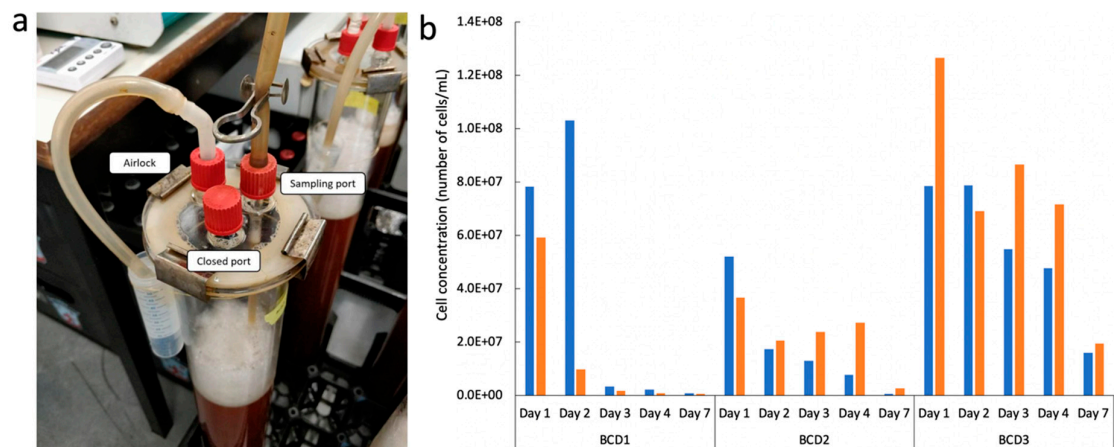

**Figure S2.** Beer fermentations in tall tube fermenters. **(a)** The set-up for the fermentation in tall tubes. The lid is equipped with three ports, one of which is used for sampling. **(b)** Evolution of the cell concentrations during fermentation determined using a Thoma cell counting chamber. Reference strains: ■, and evolved strains: ■.

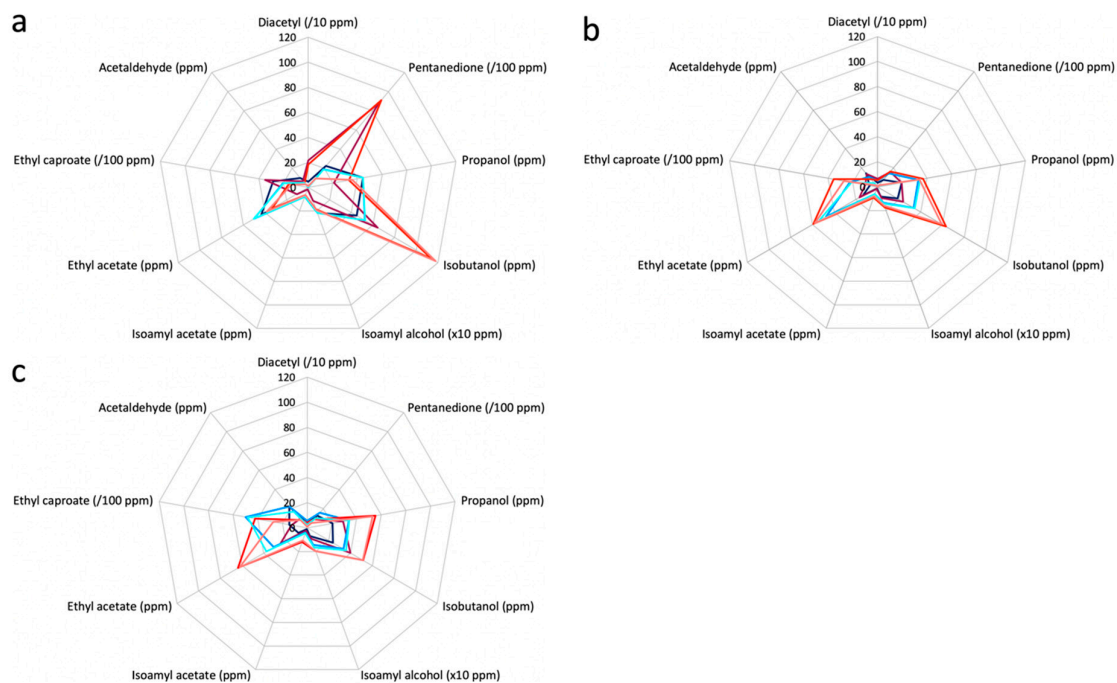

**Figure S3.** Comparison of the evolution of some flavor compounds during the tall tubes fermentations: **(a)** BCD 1, **(b)** BCD 2, and **(c)** BCD3 strain. The non-evolved reference strain is represented with blue colours after day 1 (—), day 2 (—), and day 3 (—); the evolved strain is represented by red colours after day 1 (—), day 2 (—), and day 3 (—).

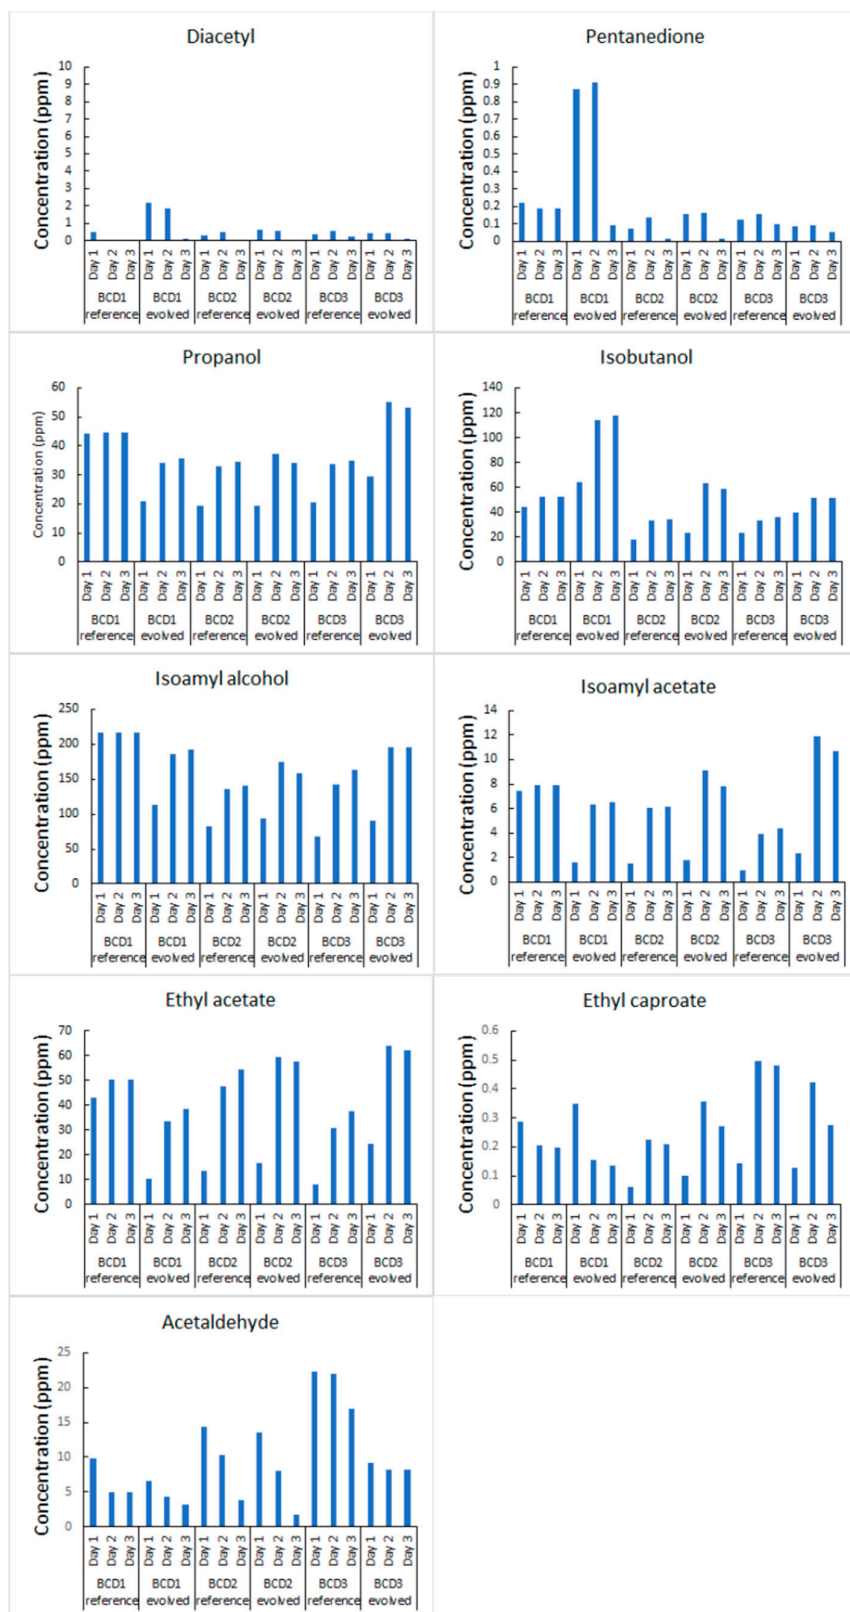

Figure S4. Comparison of the evolution of some flavor compounds during the tall tubes fermentations.

**Table S1.** Evolution of the apparent extract and ethanol content during the tall tube fermentations.

|             | Apparent extract (Ea) (%m/m) |           | Alcohol content (%v/v) |           |
|-------------|------------------------------|-----------|------------------------|-----------|
|             | Reference                    | Evolved   | Reference              | Evolved   |
| <b>BCD1</b> |                              |           |                        |           |
| Day 1       | 1.7 ± 0.1                    | 7.1 ± 0.6 | 4.9 ± 0.1              | 2.2 ± 0.3 |
| Day 2       | 1.6 ± 0.1                    | 2.0 ± 0.2 | 5.1 ± 0.0              | 4.8 ± 0.2 |
| Day 3       | 1.6 ± 0.1                    | 2.0 ± 0.1 | 5.1 ± 0.0              | 4.8 ± 0.1 |
|             | Apparent extract (Ea) (%m/m) |           | Alcohol content (%v/v) |           |
|             | Reference                    | Evolved   | Reference              | Evolved   |
| <b>BCD2</b> |                              |           |                        |           |
| Day 1       | 7.2 ± 0.0                    | 6.7 ± 0.1 | 2.5 ± 0.0              | 2.8 ± 0.2 |
| Day 2       | 2.1 ± 0.1                    | 1.6 ± 0.3 | 5.2 ± 0.0              | 5.5 ± 0.1 |
| Day 3       | 1.6 ± 0.0                    | 1.1 ± 0.4 | 5.5 ± 0.0              | 5.6 ± 0.7 |
|             | Apparent extract (Ea) (%m/m) |           | Alcohol content (%v/v) |           |
|             | Reference                    | Evolved   | Reference              | Evolved   |
| <b>BCD3</b> |                              |           |                        |           |
| Day 1       | 8.2 ± 0.2                    | 2.4 ± 0.2 | 2.0 ± 0.1              | 4.7 ± 0.1 |
| Day 2       | 3.6 ± 0.4                    | 0.9 ± 0.0 | 4.5 ± 0.1              | 5.5 ± 0.0 |
| Day 3       | 1.4 ± 0.2                    | 0.8 ± 0.0 | 5.6 ± 0.1              | 5.5 ± 0.0 |
